1 **Homologous and heterologous antibodies to coronavirus 229E, NL63, OC43, HKU1,**  
2 **SARS, MERS and SARS-CoV-2 antigens in an age stratified cross-sectional serosurvey in**  
3 **a large tertiary hospital in The Netherlands**  
4

5 Brenda M. Westerhuis<sup>1\*</sup>, Erwin de Bruin<sup>1\*</sup>, Felicity D. Chandler<sup>1</sup>, Chris R. B. Ramakers<sup>1</sup>,  
6 Nisreen M.A. Okba<sup>1</sup>, Wentao Li<sup>2</sup>, Herman Goossens<sup>3</sup>, Menno D. de Jong<sup>4</sup>, Berend Jan Bosch<sup>2</sup>,  
7 Bart L. Haagmans<sup>1</sup>, Pieter L. A. Fraaij<sup>1</sup>, Reina S. Sikkema<sup>1</sup>, Marion P.G. Koopmans<sup>#1</sup>  
8

9 \*Both authors contributed equally

10

- 11 1. Erasmus Medical Centre, Rotterdam  
12 2. University of Utrecht, Utrecht  
13 3. Antwerp University, Antwerp  
14 4. Amsterdam Medical Centre, Amsterdam  
15

16 # Corresponding author

17 Marion P.G. Koopmans

18 Wytemaweg 80

19 3015 CN Rotterdam

20 The Netherlands

21 [m.koopmans@erasmusmc.nl](mailto:m.koopmans@erasmusmc.nl)  
22

23

24 **Abstract**  
25

26

27

28 Understanding the coronavirus (CoV) antibody landscape in relation to disease and  
29 susceptibility is critical for modelling of steps in the next phase during the current covid-19  
30 pandemic. In March 2020, during the first month of the epidemic in The Netherlands, we  
31 performed cross sectional studies at two time points amongst patients of the Erasmus Medical  
32 Centre in Rotterdam, to assess the presence of antibodies against seasonal human  
33 coronaviruses (OC43, 229E, NL63, HKU1), emerging zoonotic coronaviruses (SARS, MERS)  
34 and SARS-CoV-2 in nine different age groups. We observed minimal SARS-CoV-2 reactivity  
35 early March (0.7% of sera), increasing to 3.0%, four weeks later, suggesting probably  
36 undetected cases during this early phase of the epidemic. Antibody responses were mostly  
37 coronavirus species specific at young age, but possible cross-reactivity between human  
38 seasonal CoVs was observed with increasing age.

38

39 Dear editor,

40

41 Understanding the coronavirus (CoV) antibody landscape in relation to disease and  
42 susceptibility is critical for modelling of steps in the next phase during the current covid-19  
43 pandemic. In March 2020, during the first month of the epidemic in The Netherlands, we  
44 performed cross sectional studies at two time points amongst patients of the Erasmus Medical  
45 Centre in Rotterdam, to assess the presence of antibodies against seasonal human  
46 coronaviruses (OC43, 229E, NL63, HKU1), emerging zoonotic coronaviruses (SARS, MERS)  
47 and SARS-CoV-2 in nine different age groups. We observed minimal SARS-CoV-2 reactivity  
48 early March (0.7% of sera), increasing to 3.0%, four weeks later, suggesting probably  
49 undetected cases during this early phase of the epidemic. Antibody responses were mostly  
50 coronavirus species specific at young age, but possible cross-reactivity between human  
51 seasonal CoVs was observed with increasing age.

52

53 A total of 1608 left-over plasma samples from patients of nine age categories were tested in one  
54 dilution, of which 879 were collected in early March 2020 (timepoint 1: T1), and 729 in early  
55 April 2020 (timepoint 2: T2; table 1). All plasma samples were tested against 19 different  
56 antigens from seven human coronaviruses (hCoVs) (OC43, 229E, NL63, HKU1, SARS, MERS  
57 and SARS-CoV-2). Recombinant spike proteins of the S1 subunit (all coronavirus subtypes), S  
58 ectodomain (all except 229E) and nucleocapsid proteins (OC43, 229E, NL63, HKU1, MERS and  
59 SARS) were included. The SARS-1 nucleocapsid protein has been used in the SARS-CoV-2  
60 specific analyses as described previously(1).

61

62 Positivity rates for each of the SARS-CoV-2 antigens were calculated according to the cut-offs  
63 determined, based on 100% specificity (Table 1, Figure 1, Supplemental figure). SARS-CoV-2  
64 specific antibodies (one dilution) were analyzed, for T1 and T2 separately. Despite the short

65 interval between both sampling moments, a clear rise in SARS-CoV-2 seropositivity was  
66 observed. The prevalence of antibodies to any of the SARS-CoV-2 antigens increased from  
67 0.7% (6/ 879) at T1 to 3.0% (22/729) at T2. When only taking into account plasma samples  
68 testing positive for all three antigens, the prevalence was 0.1% (1/879) at T1 and 2.3% (17/729)  
69 at T2. Most antibody positive sera were detected in age groups 40-60 and 60-80. None of the  
70 children below five years of age were seropositive (Tabel 1).

71

72

73 In sera with SARS-CoV-2 responses, crossreactivity was shown against the SARS and MERS  
74 antigens (Figure 2). The majority of antibodies binding to antigens from seasonal human  
75 coronaviruses were present from an early age onwards in most plasma samples, although  
76 differences in antibody responses were detected between coronaviruses and between antigens  
77 from the same virus (Figure 2). The median fluorescence level of hCoV antibody reactivity was  
78 lowest in 6-24 month old children and increased from age groups 2-5 years old to >20 years old,  
79 depending on the antigen. For some antigens a slight decrease in binding antibodies was  
80 observed in individuals above 80 years old.

81

82 To determine how reactivity of the different seasonal hCoV antibody titers correlate with  
83 (multiple) infections during lifetime, endpoint titers were calculated for all hCoV antigens for age  
84 groups 0-2y (n=36 samples), 2-10y (n=38), 10-40y (n=37), 40+ (n=58) and 60+ (n=39). When  
85 looking at all data combined, highest correlations were observed between S1 and the S  
86 ectodomain from the same virus, and within alpha and beta coronaviruses, respectively. When  
87 breaking the groups down in age groups, mainly strain specific signals were observed in the  
88 lowest age group, with broadening of the correlation of antibody titers within the alpha and the  
89 betacoronaviruses between the ages of 2 and 40 years, and further broadening of responses  
90 between alpha and betacoronaviruses in individuals of 60 years and older (Figure 3).

91  
92 Serological assays have been shown to be of great value in population surveys of viral  
93 infections additional to virus detection assays. In this study we used a multiplex serological  
94 protein microarray to detect possible infections of SARS-CoV-2 early in the epidemic among the  
95 general population, including children and adolescents, as well as age stratified serological  
96 responses against a broad range of other CoV strains. The seropositivity at 4 weeks after  
97 confirmation of the first cases of SARS-CoV-2 in our study population revealed early, probably  
98 undetected, cases during this period, confirming the importance of adding serosurveys to  
99 assess the extent of spread of COVID-19. The highest seroprevalence was detected in the  
100 group 40 years and older.

101  
102 Our data are in agreement with results of screening among human blood donors between 1-15  
103 April, showing an average seroprevalence of 2.7% country wide, up to 9.5% in the hardest-hit  
104 areas (2). Worldwide most early seroprevalence studies showed similar numbers ranging from  
105 0.4 – 14% (3), although seroprevalence can be considerably higher among outbreak settings (4,  
106 5). Results of serological testing in a low prevalence situation need to be interpreted with  
107 caution, as low-level cross-reactivity has been observed for most currently available assays (6).  
108 A good practice can be to use combined assay results, counting only samples that had antibody  
109 reactivity to two or three of the SARS-CoV-2 antigens as positives(7). By using this criterion,  
110 and the high stringency cut-off defined by ROC analysis including serum samples from persons  
111 with recent seasonal coronavirus infections, we trust that our estimates are robust.

112  
113 The use of leftover specimens across age ranges does provide a broader picture of community  
114 circulation than can be obtained with blood donors. The lack of SARS-CoV-2 antibody positive  
115 children below five years of age may be explained by lower infection rates or susceptibility in  
116 younger age groups, a lower proportion of severe cases, or both (8-10). We therefore were

117 interested to assess whether the lack of SARS-CoV-2 infections was potentially related to  
118 immunity from other coronavirus infections.

119  
120 The four endemic hCoVs (229E, NL63, OC43, and HKU) account for about 10% of all upper  
121 respiratory tract infections in adults (11, 12), but most CoV cases among healthcare seeking  
122 individuals with respiratory symptoms are detected in children <5 years old and elderly >64. In a  
123 limited number of clinical case series in Europe, OC43 and NL63 were most commonly  
124 detected, while HKU1 and 229E appear more infrequently or even in a temporal pattern (11, 13,  
125 14). In our study, the prevalence and the magnitude of antibody positive signals increased from  
126 two years of age, although at a different rate for the different viruses. The antibodies were  
127 mostly specific for the different human CoVs in the younger age group, with limited correlation  
128 between signals for antigens from different human seasonal coronaviruses belonging to the  
129 same genera. Therefore, we find no evidence for presence of cross-reactive antibodies as an  
130 explanation for the seemingly lower rate of SARS-CoV-2 infections in children.

131  
132 This pattern changed with increasing age, with increasing correlation between antibody signals  
133 for viruses within the same hCoV in adults, and even across hCoVs in older individuals. Cross  
134 reactivity of antibodies between seasonal coronaviruses and SARS have been described in the  
135 past. During an OC43 outbreak in British Columbia in 2003, cross-reactive antibodies to the  
136 SARS-CoV nucleocapsid protein have been shown (15) and a recent study showed very limited  
137 cross-reactivity with the SARS-CoV-2 ectodomain and S2 antigens in a naïve population, but  
138 not with the other SARS-CoV antigens (RBD, S1 and NP) (16). Our assay cut-off was set for  
139 high specificity of the SARS-CoV-2 measurements and therefore low-level binding would not be  
140 detected. However, we did observe cross-reactive antibodies to MERS-CoV S ectodomain and  
141 nucleocapsid antigens, without detectable responses to SARS-CoV-2, especially with increasing  
142 age. The possible broadening of anti S1 and S ectodomain antibodies with increasing age

143 raises questions about the functionality of cross-reactive antibodies, although cross reaction  
144 with SARS-CoV-2 was not detected.

145  
146 The methods we used have inherent disadvantages. In agreement with the general data  
147 protection regulation samples were collected in an anonymous manner, and as a consequence  
148 patients may have been included more than once. In addition, while the use of leftover serum  
149 collections is a proven method for fast deployment of sero-surveys, the study was hampered by  
150 the fact that during the first wave of the COVID-19 pandemic non-essential hospital visits were  
151 downscaled and individuals with mild respiratory disease strongly discouraged to visit health  
152 care providers. This especially affected hospital visits in the pediatric population as also  
153 reflected in our study with low numbers of serum samples for the pediatric population obtained  
154 on time point 2. It may therefore be that individuals with mild symptoms avoided the hospital and  
155 thus our study may underestimate the true sero-incidence in catchment area.

156  
157 Nonetheless, we present an overview of the coronavirus antibody landscape in persons across  
158 all age groups, and show specific responses to SARS-CoV-2 in the same multiplex assay  
159 format. The presence of possible cross-hCoV and cross-subgroup binding antibodies with  
160 increasing age warrants further study in relation to disease outcomes.

161

## 162 **Material and Methods**

163

### 164 *Plasma sample collection*

165 This protocol was based on the principle employed during the influenza A/H1N1 2009 pandemic  
166 by Public Health England as a pragmatic approach to gathering essential baseline data for  
167 population exposure assessment during a rapidly evolving epidemic (17). Leftover lithium-  
168 heparin plasma samples submitted for general 24/7 clinical chemistry analyses at the Erasmus

169 medical center were collected. Samples from patients in which a SARS-CoV-2 PCR was  
170 performed were excluded regardless of the result. Collection of plasma samples was done over  
171 a 5 days period at 2 time points, March 2nd and April 3rd. To allow for additional or repeat  
172 testing of archived samples if required clinically, left-over samples were retrieved after 4 to 7  
173 days of cold storage (4C). The majority of samples from the children's cohort (<18 years) were  
174 collected through finger or heel stick (capillary blood). The vast majority of blood from the adult  
175 age cohorts were collected via venepuncture (venous blood). Only information regarding the  
176 age was collected from the sera, covering nine age groups (Table 1). The study was approved  
177 by the institutions medical ethical board and informed consent was waived as data were  
178 collected anonymized (MEC-2020-0158).

179  
180 For assay validation, a panel of 60 serum samples from patients with confirmed seasonal  
181 coronavirus infections (OC43, 229E, HKU1 or NL63), collected before the COVID-19 outbreak  
182 were obtained from the MERMAIDS-ARI study. A panel of 56 sera from confirmed SARS-CoV-2  
183 patients, collected at more than 10 days post onset of symptoms, were used as a positive  
184 control group (by universitair ziekenhuis Antwerp) (11). Positive control serum was made from a  
185 pool of confirmed positive COVID-19 patients.

186  
187 *Laboratory procedures*

188 All sera were tested against 19 different antigens from 7 different coronaviruses known to have  
189 infected humans in the past (OC43, 229E, NL63, HKU1, SARS, MERS and SARS-CoV-2).  
190 Recombinant spike proteins of the S1 subunit (all coronavirus subtypes) or the S ectodomain  
191 (all except 229E) were expressed in HEK293 cells as described before (1, 18). Nucleocapsid  
192 proteins produced in Escherichia coli (for OC43, 229E, NL63 and HKU1; Medix Biochemica,  
193 Finland) or produced in baculovirus and insect cells (MERS and SARS; Sino biological, China)  
194 were commercially obtained.

195

196 Recombinant proteins were printed using a non-contact printer (sciFlexarrayer SX, Scienion,  
197 Germany) on glass microscope slides coated with 64 pads of nitrocellulose creating 64 protein  
198 arrays per slide which were used to measure binding antibodies present in serum, as described  
199 before (19). Briefly, serum was diluted 1 in 20 in Blotto blocking buffer (Thermo Fisher Scientific  
200 Inc., Rockford, USA) containing 0,1 percent Surfact Amps (Thermo Fisher Scientific Inc.) and  
201 used in one dilution. In addition, 18-20 randomly selected serum samples per age group were  
202 tested in six dilutions to obtain full antibody titers to allow correlation plots. For this, randomly  
203 selected serum samples were titrated in 4-fold serum dilution steps? ranging from 1 in 20 to  
204 20480. Titer values were calculated by curve fitting using variable slope, minimal fluorescence  
205 of 1000 and maximum fluorescence of 65535, as done before using Graphpad Prism (9). After  
206 serum incubation and washing, slides were incubated with goat anti human IgG (Fab-specific)  
207 conjugated to Alexa Fluor 647 (Jackson ImmunoResearch Laboratories Inc., West Grove, USA)  
208 1 in 1000 diluted in Blotto blocking buffer containing 0,1 percent Surfact Amps. Single spot  
209 median fluorescent signals using per spot background correction were measured using a  
210 Powerscanner (Tecan Group Ltd, Mannedorf, Switzerland).

211

## 212 **Analysis**

213

214 Fluorescent cut-offs to determine positivity at a 1 in 20 serum dilution were determined, using  
215 the validation panels of seasonal CoV (negative group) and SARS-CoV-2 patients (positive  
216 group), by ROC-curves at which 100 percent specificity was chosen for high predictive value of  
217 positive signals, using Graphpad Prism (GraphPad software, version 5.01, San Diego, USA).  
218 Figures were made using Graphpad Prism (version 5.01) Correlation plots were made based on  
219 the fully titrated samples. Pearson correlation heatmaps were made using the pheatmap  
220 package using R Studio.



221

## 222 **Author Contributions**

223 BW, EdB, RS and MK wrote the manuscript and executed the analyses, FC executed the  
224 laboratory analyses, CR, PF, MdJ, and HG were involved in the sampling design and sample  
225 collection, EdB, NO, BJB, WL, BH and MK were involved in assay design and validation, all  
226 authors read and contributed to the final manuscript.

227

## 228 **Competing Interests statement**

229 The authors declare no competing interests

230

## 231 **References**

232

233 1. Okba NMA, Müller MA, Li W, Wang C, GeurtsvanKessel CH, Corman VM, et al. Severe  
234 Acute Respiratory Syndrome Coronavirus 2-Specific Antibody Responses in Coronavirus  
235 Disease 2019 Patients. *Emerg Infect Dis.* 2020;26(7).

236 2. Slot E, Hogema BM, Reusken CBEM, Reimerink JH, Molier M, Karregat JHM, et al.  
237 Herd immunity is not a realistic exit strategy during a COVID-19 outbreak. 2020.

238 3. Bobrovitz N, Arora RK, Yan T, Rahim H, Duarte N, Boucher E, et al. Lessons from a  
239 rapid systematic review of early SARS-CoV-2 serosurveys. medRxiv.

240 2020:2020.05.10.20097451.

241 4. Fontanet A, Tondeur L, Madec Y, Grant R, Besombes C, Jolly N, et al. Cluster of  
242 COVID-19 in northern France: A retrospective closed cohort study. medRxiv.

243 2020:2020.04.18.20071134.

244 5. Houlihan C, Vora N, Byrne T, Lewer D, Heaney J, Moore DA, et al. SARS-CoV-2 virus  
245 and antibodies in front-line Health Care Workers in an acute hospital in London: preliminary

246 results from a longitudinal study. medRxiv. 2020:2020.06.08.20120584.

- 247 6. GeurtsvanKessel CH, Okba NMA, Igloi Z, Bogers S, Embregts CWE, Laksono BM, et al.  
248 An evaluation of COVID-19 serological assays informs future diagnostics and exposure  
249 assessment. *Nature Communications*. 2020;11(1):3436.
- 250 7. den Hartog G, Schepp RM, Kuijper M, GeurtsvanKessel C, van Beek J, Rots N, et al.  
251 SARS-CoV-2-specific antibody detection for sero-epidemiology: a multiplex analysis approach  
252 accounting for accurate seroprevalence. *medRxiv*. 2020:2020.06.18.20133660.
- 253 8. Davies NG, Klepac P, Liu Y, Prem K, Jit M, Pearson CAB, et al. Age-dependent effects  
254 in the transmission and control of COVID-19 epidemics. *Nature Medicine*. 2020.
- 255 9. Lu X, Zhang L, Du H, Zhang J, Li YY, Qu J, et al. SARS-CoV-2 Infection in Children. *N*  
256 *Engl J Med*. 2020;382(17):1663-5.
- 257 10. Wu Z, McGoogan JM. Characteristics of and Important Lessons From the Coronavirus  
258 Disease 2019 (COVID-19) Outbreak in China: Summary of a Report of 72 314 Cases From the  
259 Chinese Center for Disease Control and Prevention. *Jama*. 2020.
- 260 11. Nickbakhsh S, Ho A, Marques DFP, McMenemy J, Gunson RN, Murcia PR.  
261 Epidemiology of Seasonal Coronaviruses: Establishing the Context for the Emergence of  
262 Coronavirus Disease 2019. *J Infect Dis*. 2020;222(1):17-25.
- 263 12. Paules CI, Marston HD, Fauci AS. Coronavirus Infections—More Than Just the  
264 Common Cold. *Jama*. 2020;323(8):707-8.
- 265 13. Heimdal I, Moe N, Krokstad S, Christensen A, Skanke LH, Nordbø SA, et al. Human  
266 Coronavirus in Hospitalized Children With Respiratory Tract Infections: A 9-Year Population-  
267 Based Study From Norway. *J Infect Dis*. 2019;219(8):1198-206.
- 268 14. Dijkman R, Jebbink MF, Gaunt E, Rossen JWA, Templeton KE, Kuijpers TW, et al. The  
269 dominance of human coronavirus OC43 and NL63 infections in infants. *Journal of Clinical*  
270 *Virology*. 2012;53(2):135-9.

- 271 15. Patrick DM, Petric M, Skowronski DM, Guasparini R, Booth TF, Krajden M, et al. An  
272 Outbreak of Human Coronavirus OC43 Infection and Serological Cross-reactivity with SARS  
273 Coronavirus. *Can J Infect Dis Med Microbiol.* 2006;17(6):330-6.
- 274 16. de Assis RR, Jain A, Nakajima R, Jasinskas A, Felgner J, Obiero JM, et al. Analysis of  
275 SARS-CoV-2 Antibodies in COVID-19 Convalescent Blood using a Coronavirus Antigen  
276 Microarray. *bioRxiv.* 2020:2020.04.15.043364.
- 277 17. Miller E, Hoschler K, Hardelid P, Stanford E, Andrews N, Zambon M. Incidence of 2009  
278 pandemic influenza A H1N1 infection in England: a cross-sectional serological study. *Lancet.*  
279 2010;375(9720):1100-8.
- 280 18. Wang C, Li W, Drabek D, Okba NMA, van Haperen R, Osterhaus A, et al. A human  
281 monoclonal antibody blocking SARS-CoV-2 infection. *Nat Commun.* 2020;11(1):2251.
- 282 19. Reusken CB, Haagmans BL, Muller MA, Gutierrez C, Godeke GJ, Meyer B, et al. Middle  
283 East respiratory syndrome coronavirus neutralising serum antibodies in dromedary camels: a  
284 comparative serological study. *Lancet Infect Dis.* 2013;13(10):859-66.
- 285  
286  
287  
288  
289  
290

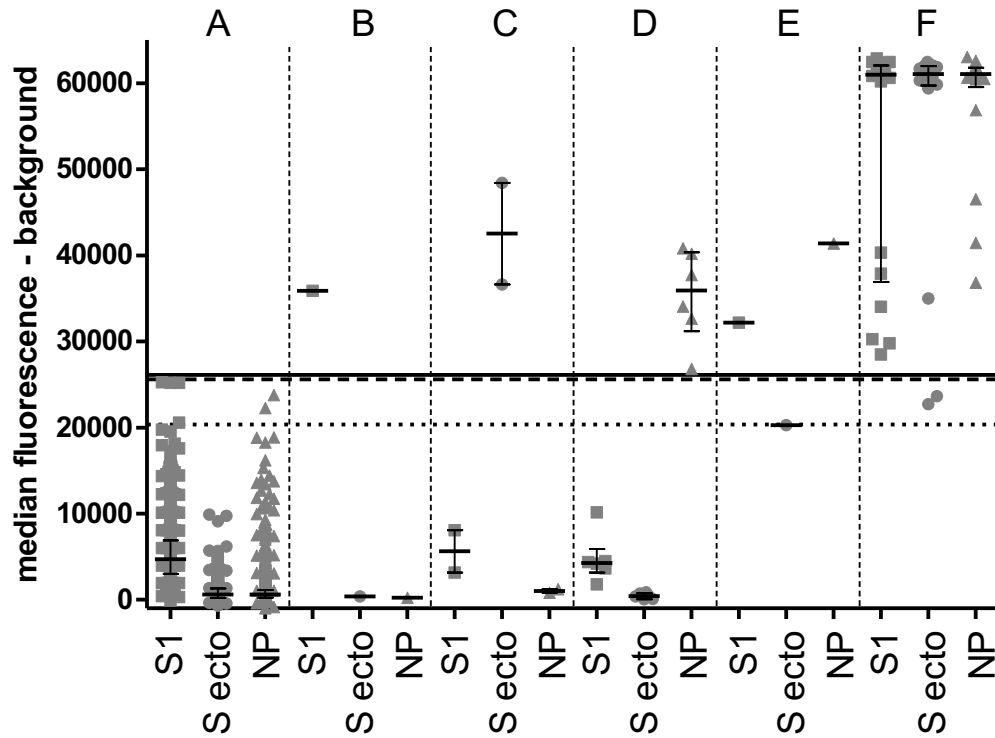

Figure 1; Overview of all fluorescent signals detected, depicting fluorescence on the Y-axis, and SARS-CoV-2 antigens on the X-axis grouped on positivity profile, where; negative for all antigens (A), only positive for S1 (B, n=1), only positive for S-ecto (C, n=2), only positive for NP (D, n=6), positive for S1 and NP (E, n=1) and positive for all 3 SARS-CoV-2 antigens (F, n=18). Antigen specific cut-offs are depicted for S1 (horizontal line), S ecto (broken line) and NP (dotted line). Median values and interquartile range are depicted per group

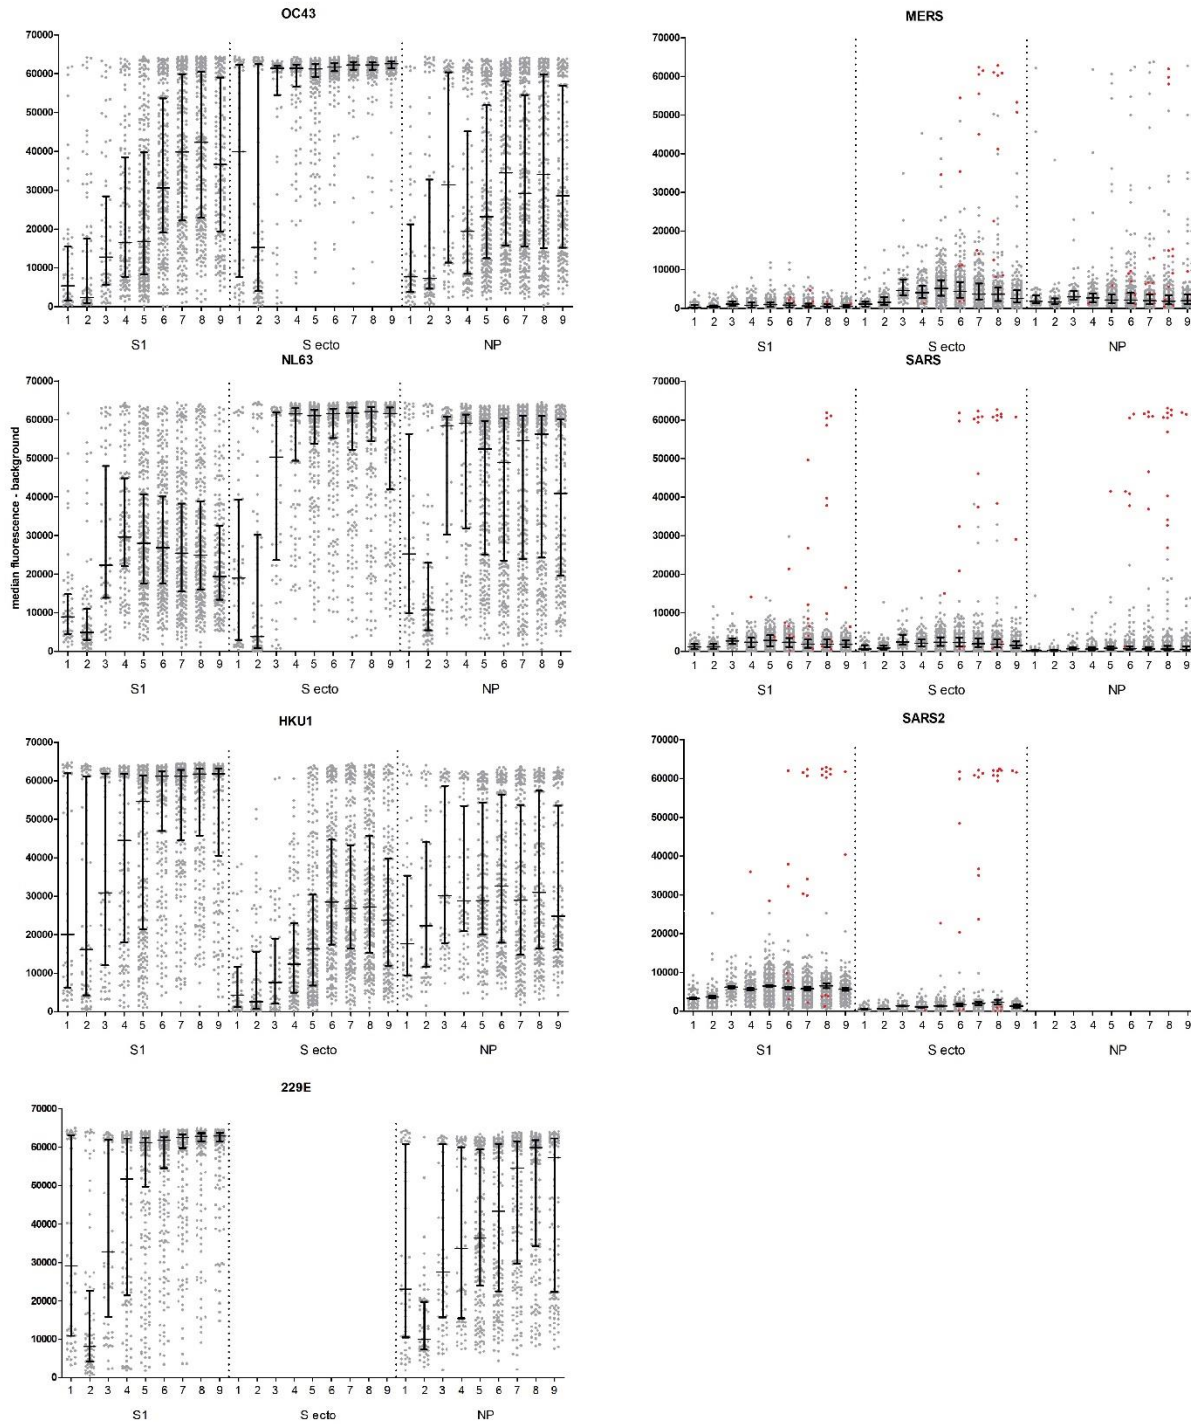

Figure 2; Fluorescence signals against CoV antigens. Sera with fluorescence signals above the cutoff against SARS-CoV-2 S1 and S-ecto and SARS-CoV NP are indicated in red.

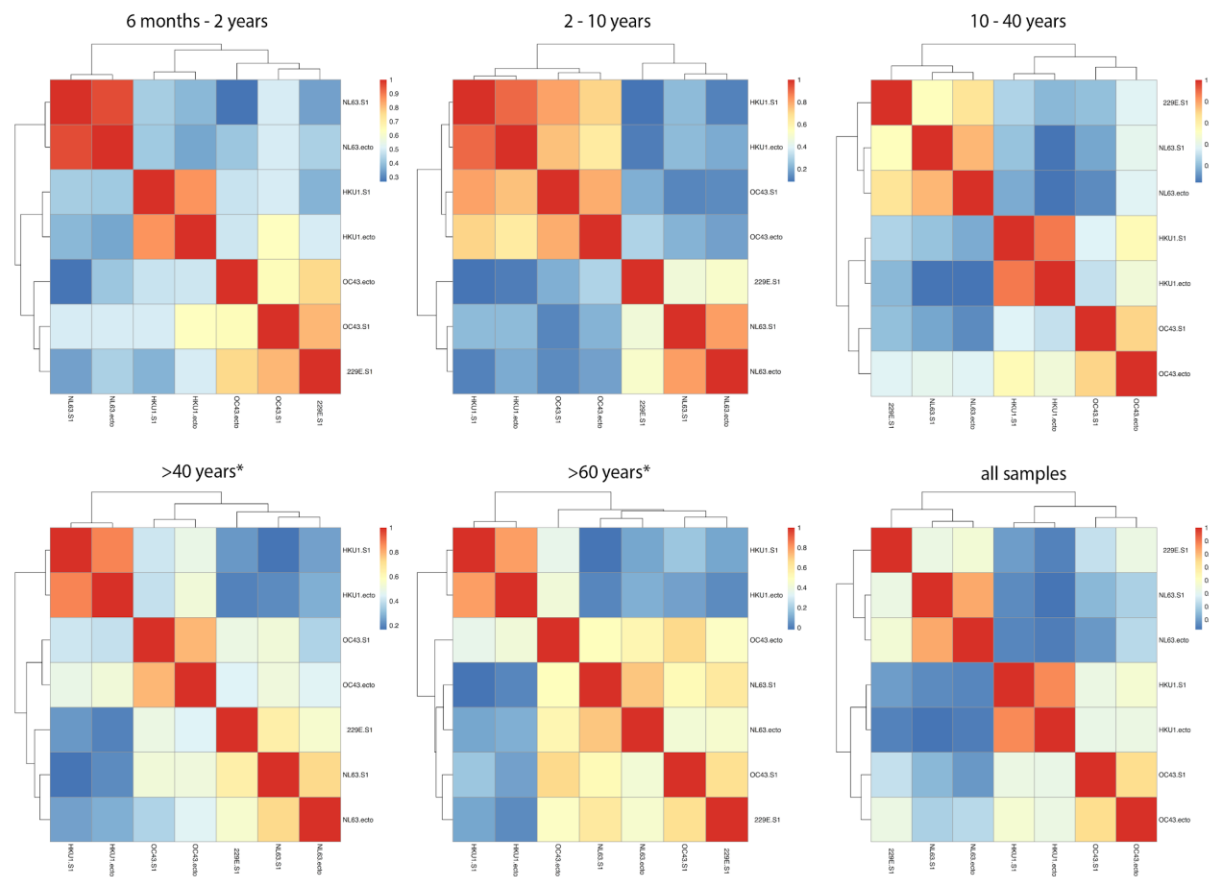

Figure 3; Pearson correlation heatmaps of binding antibody titers to HKU1, OC43, NL63 and 229E S1 and ectodomains

| <b>S1</b>            | timepoint 1 |          |            | timepoint 2 |          |            |
|----------------------|-------------|----------|------------|-------------|----------|------------|
|                      | total       | positive | percentage | total       | positive | percentage |
| 6-12 months          | 41          | 0        | 0,0        | 17          | 0        | 0,0        |
| 1-2 years            | 75          | 0        | 0,0        | 14          | 0        | 0,0        |
| 2-5 years            | 42          | 0        | 0,0        | 24          | 0        | 0,0        |
| 5-10 years           | 96          | 1        | 1,0        | 34          | 0        | 0,0        |
| 10-20 years          | 131         | 0        | 0,0        | 139         | 1        | 0,7        |
| 20-40 years          | 131         | 0        | 0,0        | 140         | 3        | 2,1        |
| 40-60 years          | 134         | 1        | 0,7        | 140         | 5        | 3,6        |
| 60-80 years          | 124         | 0        | 0,0        | 139         | 7        | 5,0        |
| 80+ years            | 105         | 0        | 0,0        | 82          | 2        | 2,4        |
| total                | 879         | 2        | 0,2        | 729         | 18       | 2,5        |
| <b>S ecto</b>        | timepoint 1 |          |            | timepoint 2 |          |            |
|                      | total       | positive | percentage | total       | positive | percentage |
| 6-12 months          | 41          | 0        | 0,0        | 17          | 0        | 0,0        |
| 1-2 years            | 75          | 0        | 0,0        | 14          | 0        | 0,0        |
| 2-5 years            | 42          | 0        | 0,0        | 24          | 0        | 0,0        |
| 5-10 years           | 96          | 0        | 0,0        | 34          | 0        | 0,0        |
| 10-20 years          | 131         | 0        | 0,0        | 139         | 1        | 0,7        |
| 20-40 years          | 131         | 0        | 0,0        | 140         | 3        | 2,1        |
| 40-60 years          | 134         | 2        | 1,5        | 140         | 5        | 3,6        |
| 60-80 years          | 124         | 0        | 0,0        | 139         | 7        | 5,0        |
| 80+ years            | 105         | 0        | 0,0        | 82          | 2        | 2,4        |
| total                | 879         | 2        | 0,2        | 729         | 18       | 2,5        |
| <b>NP</b>            | timepoint 1 |          |            | timepoint 2 |          |            |
|                      | total       | positive | percentage | total       | positive | percentage |
| 6-12 months          | 41          | 0        | 0,0        | 17          | 0        | 0,0        |
| 1-2 years            | 75          | 0        | 0,0        | 14          | 0        | 0,0        |
| 2-5 years            | 42          | 0        | 0,0        | 24          | 0        | 0,0        |
| 5-10 years           | 96          | 0        | 0,0        | 34          | 0        | 0,0        |
| 10-20 years          | 131         | 0        | 0,0        | 139         | 1        | 0,7        |
| 20-40 years          | 131         | 1        | 0,8        | 140         | 4        | 2,9        |
| 40-60 years          | 134         | 1        | 0,7        | 140         | 5        | 3,6        |
| 60-80 years          | 124         | 2        | 1,6        | 139         | 9        | 6,5        |
| 80+ years            | 105         | 0        | 0,0        | 82          | 2        | 2,4        |
| total                | 879         | 4        | 0,5        | 729         | 21       | 2,9        |
| <b>S1, Secto, NP</b> | timepoint 1 |          |            | timepoint 2 |          |            |
|                      | total       | positive | percentage | total       | positive | percentage |
| 6-12 months          | 41          |          | 0,0        | 17          |          | 0,0        |
| 1-2 years            | 75          |          | 0,0        | 14          |          | 0,0        |
| 2-5 years            | 42          |          | 0,0        | 24          |          | 0,0        |

|             |     |   |     |     |    |     |
|-------------|-----|---|-----|-----|----|-----|
| 5-10 years  | 96  |   | 0,0 | 34  |    | 0,0 |
| 10-20 years | 131 |   | 0,0 | 139 | 1  | 0,7 |
| 20-40 years | 131 |   | 0,0 | 140 | 2  | 1,4 |
| 40-60 years | 134 | 1 | 0,7 | 140 | 5  | 3,6 |
| 60-80 years | 124 |   | 0,0 | 139 | 7  | 5,0 |
| 80+ years   | 105 |   | 0,0 | 82  | 2  | 2,4 |
| total       | 879 | 1 | 0,1 | 729 | 17 | 2,3 |

Table 1. Seropositivity against SARS-CoV-2 antigens
